# Supplementary material for: Histopathological growth patterns of colorectal liver metastasis exhibit little heterogeneity and can be determined with a high diagnostic accuracy
Source: Springer Nature journal article supplement (doi:10.1007/s10585-019-09975-0), 2019-05-27
Supplement: MOESM1 [file 16752840]

**Supplementary table 1.** Comparison of baseline characteristics of chemo-naive patients in the original and external validation cohort included for between metastasis concordance analysis

|                                                 |           | Cohort                 |                          | p-value |
|-------------------------------------------------|-----------|------------------------|--------------------------|---------|
|                                                 |           | Original<br>n=121 (%a) | Validation<br>n=168 (%a) |         |
| Gender                                          | Female    | 75 (62)                | 107 (64)                 | 0.717   |
|                                                 | Male      | 46 (38)                | 60 (36)                  |         |
|                                                 | Missing   | 0 (0)                  | 1 (1)                    |         |
| Age at resection CRLM - ( <i>median [IQR]</i> ) |           | 63.0 [60.0, 73.0]      | 63.0 [56.0, 69.0]        | 0.033   |
| Primary tumour location                         | Colon     | 69 (58)                | 88 (53)                  | 0.437   |
|                                                 | Rectum    | 50 (42)                | 77 (47)                  |         |
|                                                 | Missing   | 2 (2)                  | 3 (2)                    |         |
| T-stage                                         | pT 0-2    | 29 (24)                | 26 (16)                  | 0.072   |
|                                                 | pT 3-4    | 91 (76)                | 140 (84)                 |         |
|                                                 | Missing   | 1 (1)                  | 2 (1)                    |         |
| N-stage                                         | N0        | 43 (36)                | 56 (34)                  | 0.713   |
|                                                 | N+        | 77 (64)                | 110 (66)                 |         |
|                                                 | Missing   | 1 (1)                  | 2 (1)                    |         |
| Disease-free interval                           | >1 year   | 49 (40)                | 67 (40)                  | 0.982   |
|                                                 | ≤1 year   | 72 (60)                | 99 (60)                  |         |
|                                                 | Missing   | 0 (0)                  | 2 (1)                    |         |
| Diameter of largest CRLM                        | ≤5 cm     | 105 (88)               | 84 (50)                  | <0.001  |
|                                                 | >5 cm     | 15 (12)                | 83 (50)                  |         |
|                                                 | Missing   | 1 (1)                  | 1 (1)                    |         |
| Preoperative CEA                                | ≤200 µg/L | 108 (92)               | 151 (90)                 | 0.580   |
|                                                 | >200 µg/L | 9 (8)                  | 16 (10)                  |         |
|                                                 | Missing   | 4 (3)                  | 1 (1)                    |         |
| Histopathological growth pattern                | dHGP      | 18 (15)                | 22 (13)                  | 0.665   |
|                                                 | non-dHGP  | 103 (85)               | 146 (87)                 |         |

*CRLM: colorectal liver metastasis, IQR: interquartile range, CEA: carcinoembryonic antigen and (non-)dHGP: (non-)desmoplastic type histopathological growth pattern*  
*a Percentages are expressed as proportions across each stratum (i.e. excluding missing). Percentages for missing are expressed as proportion of missing values within each stratum.*

## Diagnostic accuracy

1 vs 2  $p=0.039$

2 vs 3  $p=0.341$

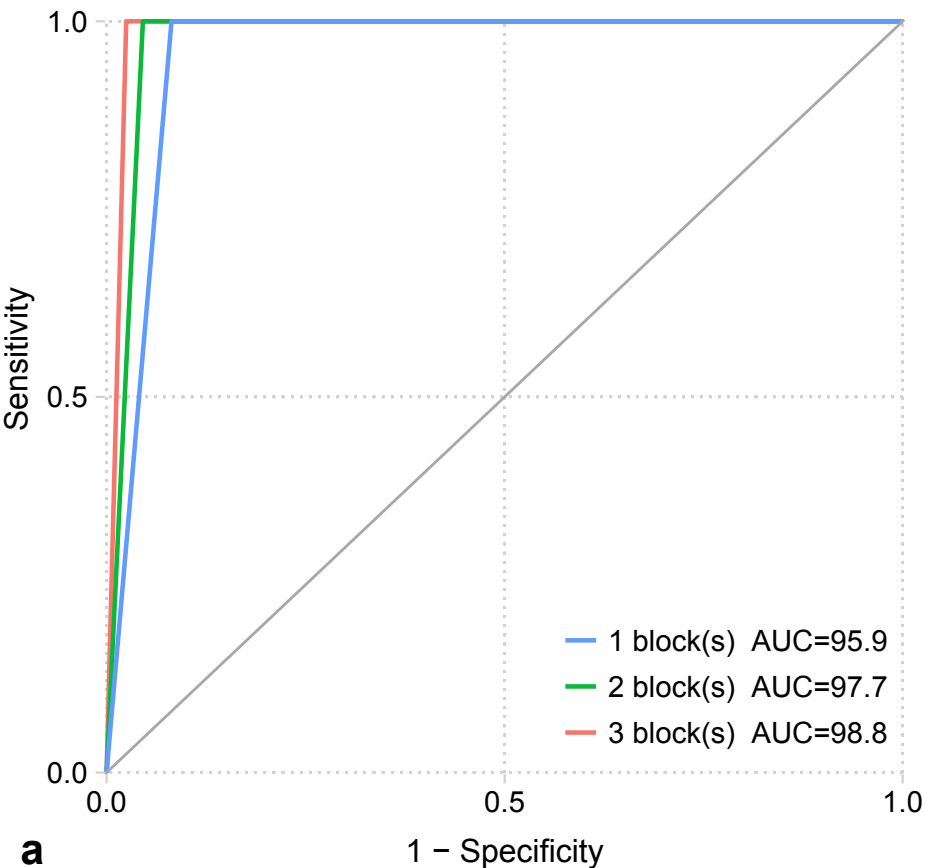

## Diagnostic accuracy

1 vs 2  $p=0.026$

2 vs 3  $p=0.235$

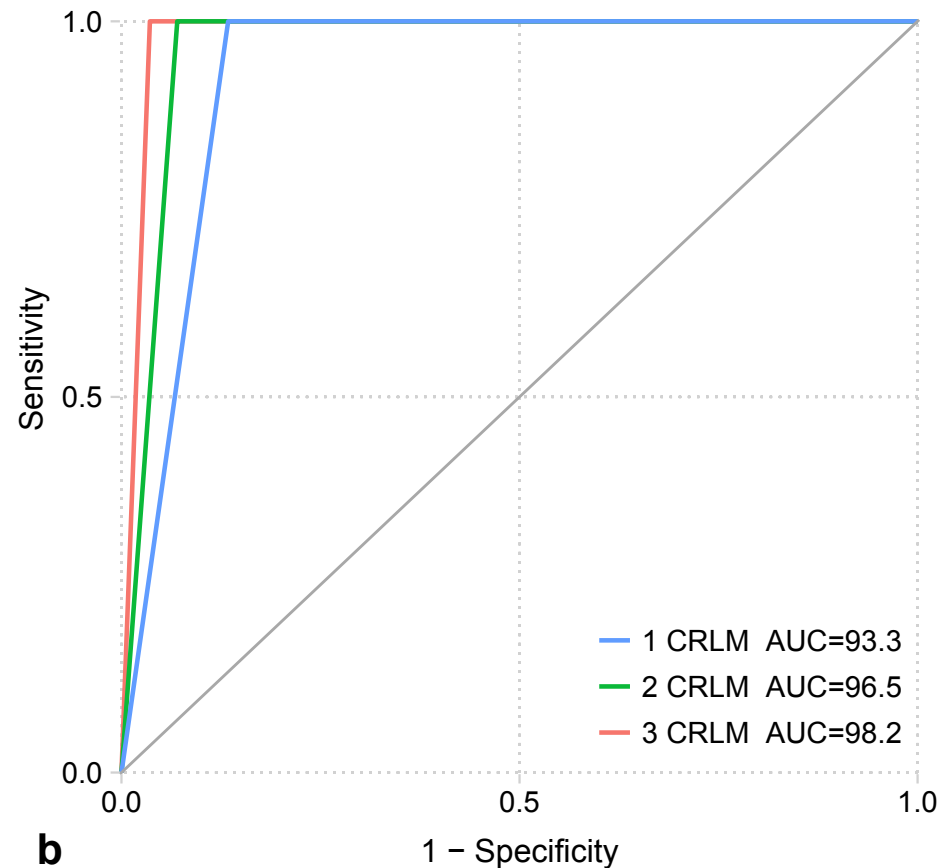

**Supplementary figure 1:** (a) Receiver operating characteristics (ROC) curves for determining metastasis histopathological growth pattern (HGP) by scoring 1, 2 or 3 block(s) respectively. (b) ROC curves for determining patient HGP by scoring 1, 2 or 3 resected CRLM respectively. *AUC: area under the curve.*
